# Supplementary material
Source: HighWire-hosted journal article supplement (http://gut.bmjjournals.com/highwire/filestream/192543/field_highwire_adjunct_files/0/Supporting_material_S1.pdf)
Supplement: Supporting_material_S1.pdf [file Supporting_material_S1.pdf]

### **S1 - Soluble non-starch polysaccharide (NSP) composition of green plantain.**

Green plantain (ripeness stage 1) flour was produced in Ecuador from locally grown cultivars *Musa* AAB (Horn) var. Dominico. Use of green plantain ensures that water-soluble components of the cell wall, in particular pectins, have a wider range of structural characteristics and a higher molecular weight than would be obtained from ripe plantains. Yield of soluble non-starch fiber from this is 6-7% dry matter with a ratio of acidic:neutral polysaccharides of ~9:1. The molecular weight distribution of the polysaccharides is between 900 and ~5000 kDa. Monosaccharide composition (**Table S1**) reflects the high quantities of pectin present and the high mannose is characteristic of plantain cell walls.

**Table S1** - Soluble non-starch polysaccharide (NSP) composition of green plantain (ripeness stage 1) sourced from Ecuador: average values obtained from plantains grown over three consecutive seasons. UA = uronic acid

| Soluble NSP composition (g/100g NSP) |         |           |          |         |        |        |           |
|--------------------------------------|---------|-----------|----------|---------|--------|--------|-----------|
| UA                                   | glucose | galactose | rhamnose | mannose | fucose | xylose | arabinose |
| 26.8                                 | 25.2    | 8.6       | 2.4      | 18.7    | 2.6    | 6.7    | 9.0       |
